# Supplementary material
Source: ML conference proceedings conference paper supplement (https://www.ecva.net/papers/eccv_2024/papers_ECCV/html/3880_ECCV_2024_paper.php)
Supplement: Supplementary file 1 [file 03880-supp.pdf]

# ArtVLM: Attribute Recognition Through Vision-Based Prefix Language Modeling

William Yicheng Zhu<sup>1\*</sup>, Keren Ye<sup>1\*</sup>, Junjie Ke<sup>1</sup>, Jiahui Yu<sup>2†</sup>,  
Leonidas Guibas<sup>1</sup>, Peyman Milanfar<sup>1</sup>, and Feng Yang<sup>1</sup>

<sup>1</sup> Google Research <sup>2</sup> OpenAI

## 1 Limitations

One limitation to our proposed method is its increased computational cost. Generative retrieval has  $n$  autoregressive text decoding steps, where  $n$  is the length of the retrieval template sentence, while contrastive retrieval has one text encoding step. Given the short and fixed-length sentence templates in the attribute learning context, the computational complexity of generative retrieval is  $n \times$  contrastive ( $n = 2$  to  $4$ ). In addition, the text-only attribute embeddings in contrastive retrieval can be precomputed and cached in advance, which would make contrastive retrieval take 0 encoding steps at inference time. This is not possible for generative retrieval, as it is not possible to precompute a part of the likelihood of generating an image-object-attribute triple. Another limitation to the generative retrieval approach is that it is specifically designed for tasks where the assumed lengths of answers or prompts are similar. Since the sum of log probabilities in  $L^{(gen)}$  is influenced by the length of the text, the approach is biased towards shorter answers. In the context of attribute prediction tasks, the assumption of similar lengths holds true, allowing us to treat attribute prompt optimization as joint probability optimization in a graph model. This task formulation sets it apart from VQA tasks, which typically involve multiple-choice questions with answers of varying lengths. It is worth noting that this limitation does not undermine our main contribution, which is the development of a novel formulation and framework that connects knowledge from large-scale prefixLM pre-training to the method of generative retrieval for attribute recognition problems.

## 2 More qualitative examples

We provide more examples to compare our zero-shot retrieval methods, we also include the results from the fully-supervised method SCoNE [14] trained on the VAW dataset. Fig. 1 at the end of the supplementary material shows the results. Some interesting observations can be made. First, VAW is still a closed domain

---

\* Equal contribution.

† Work done at Google.

**Table 1:** Comparing to the SOTA on the VAW dataset. The top rows show the baseline models; the last three rows shows the results of our method which finetunes the generative prompts. For mA, we report mA@threshold=0.005 as we cross-validated.

| Methods                         | mAP         | Overall           |             |                   |
|---------------------------------|-------------|-------------------|-------------|-------------------|
|                                 |             | mR <sup>@15</sup> | mA          | F1 <sup>@15</sup> |
| ResNet-Bas.-CE                  | 56.4        | 55.8              | 50.3        | 61.5              |
| LSEP                            | 61.0        | 50.7              | 67.1        | 62.3              |
| PartialBCE+GNN                  | 62.3        | 52.3              | 68.9        | 63.9              |
| ResNet-Bas.                     | 63.0        | 52.1              | 68.6        | 63.9              |
| ML-GCN                          | 63.0        | 52.8              | 69.5        | 64.1              |
| sarafianos2018deep              | 64.6        | 51.1              | 68.3        | 64.6              |
| SCoNE                           | 68.3        | 58.3              | 71.5        | <b>70.3</b>       |
| TAP (w/o in-domain PT)          | 65.4        | 54.2              | 67.2        | 66.4              |
| TAP (in-domain PT)              | 73.4        | 63.3              | 73.5        | 71.1              |
| Ours“ $\{A\}\{O\}$ ”            | 70.8        | 61.8              | 73.7        | 68.3              |
| Ours“ $\{O\}$ is $\{A\}$ ”      | <b>72.0</b> | <b>62.1</b>       | <b>74.7</b> | <b>68.7</b>       |
| Ours“ $\{A\}\{O\}$ is $\{A\}$ ” | <b>71.9</b> | <b>62.6</b>       | <b>74.4</b> | <b>68.7</b>       |

dataset, lacking in the coverage of long-tailed attributes. In example (2), our generative retrieval predicts “decorative”, “antique”, and “bamboo”, which are visually salient and grammatically correct. However, the ground-truth annotation does not include these two options. Second, compared to others, generative retrieval can surface some of the most significant attributes in the examples. For example, “in the background”, “decorative”, “worn”, or “closed”. However, many predictions of the contrastive retrieval method are visually imperceptible or incorrect, such as arch-shaped, standing, partially-eaten, water.

### 3 Additional Evaluation Results

We include additional results on the VAW experiments in Tab. 1, including the less comparable metrics of mR<sup>@15</sup> and F1<sup>@15</sup>, which were omitted in the main text due to space constraints. Our method achieves the second place only slightly behind TAP, despite focusing more on cross-domain knowledge extraction and not on constructing task-specific models, which may involve fitting to the evaluation dataset at hand using specialized modules, training procedures, or special training data like segmentation masks that are expensive or impossible to scale.

Furthermore, to qualitatively demonstrate our model’s superior performance on the less frequent categories in the distribution long tail of the Medium (72.0% mAP vs 64.8% mAP) and Tail (60.6% mAP vs 48.0% mAP) attribute classes, we show below Tab. 2 of model performance on the least frequent attributes in VAW:

**Table 2:** Model performance on the least frequent attributes in VAW

| Methods     | Model     |               |
|-------------|-----------|---------------|
|             | SCoNE mAP | Our mAP       |
| nylon       | 0.6984    | 0.5333        |
| bell shaped | 0.6955    | <b>0.9167</b> |
| braided     | 0.3893    | <b>0.7046</b> |
| styrofoam   | 0.3591    | 0.3354        |
| spiral      | 0.2294    | <b>0.8605</b> |
| kissing     | 0.0409    | <b>0.4085</b> |
| wallpapered | 0.5293    | <b>0.8956</b> |
| smoking     | 0.1966    | <b>0.3671</b> |
| stucco      | 0.3774    | <b>0.5914</b> |
| cubed       | 0.1102    | <b>0.4258</b> |
| TAIL MEAN   | 0.4800    | <b>0.5940</b> |

## 4 Image Attribution

In this paper we display several images from the VAW dataset. The Flickr links and the license information for these images can be found in Tab. 3. We thank the original photographers for sharing their photos.

**Table 3:** Flickr links and license of the images.

| Flickr link                                                                                                     | User         | License         |
|-----------------------------------------------------------------------------------------------------------------|--------------|-----------------|
| <b>Paper Fig. 4 (from left to right, top to bottom)</b>                                                         |              |                 |
| <a href="https://www.flickr.com/photos/mount_otz/31929683/">flickr.com/photos/mount_otz/31929683/</a>           | mount_otz    | CC BY-NC-SA 2.0 |
| <a href="https://www.flickr.com/photos/jenny-pics/2381135314/">flickr.com/photos/jenny-pics/2381135314/</a>     | jenny-pics   | CC BY 2.0       |
| <a href="https://www.flickr.com/photos/worldofjan/2984166899/">flickr.com/photos/worldofjan/2984166899/</a>     | worldofjan   | CC BY-NC 2.0    |
| <a href="https://www.flickr.com/photos/23909838@N02/3363471858/">flickr.com/photos/23909838@N02/3363471858/</a> | 23909838@N02 | CC BY-SA 2.0    |
| <b>Supplementary materials Fig. 1 (from top to bottom)</b>                                                      |              |                 |
| <a href="https://www.flickr.com/photos/felipelopez/2660779383/">flickr.com/photos/felipelopez/2660779383/</a>   | felipelopez  | CC BY-NC 2.0    |
| <a href="https://www.flickr.com/photos/afagen/2269170288/">flickr.com/photos/afagen/2269170288/</a>             | afagen       | CC BY-NC-SA 2.0 |
| <a href="https://www.flickr.com/photos/nbarcet/2172355975/">flickr.com/photos/nbarcet/2172355975/</a>           | nbarcet      | CC BY 2.0       |
| <a href="https://www.flickr.com/photos/dammit_jack/1523816737/">flickr.com/photos/dammit_jack/1523816737/</a>   | dammit_jack  | CC BY-NC 2.0    |
| <a href="https://www.flickr.com/photos/mjhagen/4347200481/">flickr.com/photos/mjhagen/4347200481/</a>           | mjhagen      | CC BY 2.0       |

|                                                                                                   |                                                                                     |                                                                                                                                                                                                                                                                                                                    |                                                                                                                                                                                                                                                                                                                                       |                                                                                                                                                                                                                                                                                         |
|---------------------------------------------------------------------------------------------------|-------------------------------------------------------------------------------------|--------------------------------------------------------------------------------------------------------------------------------------------------------------------------------------------------------------------------------------------------------------------------------------------------------------------|---------------------------------------------------------------------------------------------------------------------------------------------------------------------------------------------------------------------------------------------------------------------------------------------------------------------------------------|-----------------------------------------------------------------------------------------------------------------------------------------------------------------------------------------------------------------------------------------------------------------------------------------|
| (1) Object: mountain<br>GT Attributes: tree-covered                                               | 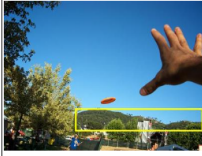   | <b>Generative</b><br>-21.891 in the background<br>-23.587 green<br>-23.649 for sale<br>-23.744 blue<br>-24.557 water<br>-24.598 small<br>-24.677 red<br>-24.993 relaxing<br>-25.057 white<br>-25.085 closed<br>-25.109 orange<br>-25.17 open<br>-25.304 clear<br>-25.328 in the air<br>-25.396 sleeping            | <b>Contrastive</b><br>0.197 arch shaped<br><b>0.197 tree-covered</b><br>0.196 stucco<br>0.196 red striped<br>0.194 cylindrical<br>0.193 partially visible<br>0.193 trimmed<br>0.193 side view<br>0.191 statue<br>0.191 displayed<br>0.191 graffitied<br>0.19 looking down<br>0.189 looking up<br>0.189 rolled up<br>0.187 wallpapered | <b>SCoNE[14]</b><br><b>0.998 tree-covered</b><br>0.994 green<br>0.989 grassy<br>0.972 in the background<br>0.963 full<br>0.943 far away<br>0.901 wide<br>0.893 tall<br>0.688 lush<br>0.655 dense<br>0.631 large<br>0.587 dark<br>0.575 rocky<br>0.434 leafy<br>0.427 small              |
| (2) Object: lamp<br>GT Attributes: vertical, amber, orange                                        |    | <b>Generative</b><br>-19.623 decorative<br>-19.842 bronze<br>-19.907 antique<br>-19.908 for sale<br>-20.316 used<br>-20.316 white<br>-20.322 wooden<br>-20.338 golden<br>-20.452 small<br>-20.576 painted<br>-20.606 open<br>-20.715 bamboo<br>-20.717 yellow<br>-20.771 on the wall<br>-20.811 hanging            | <b>Contrastive</b><br>0.252 wicker<br>0.251 trimmed<br>0.249 displayed<br>0.246 tucked in<br>0.245 wallpapered<br>0.244 decorative<br>0.244 wispy<br>0.243 cushioned<br>0.243 resting<br>0.242 pinned<br>0.242 pinstriped<br>0.241 upholstered<br>0.241 buttoned<br>0.241 unlit<br>0.241 bamboo                                       | <b>SCoNE[14]</b><br>0.982 standing<br><b>0.979 orange</b><br>0.973 bright<br>0.959 illuminated<br>0.946 golden<br>0.935 shaded<br>0.93 modern<br>0.921 thin<br>0.921 yellow<br><b>0.901 vertical</b><br>0.871 small<br>0.778 brown<br>0.771 rounded<br>0.701 tall<br>0.667 tiny         |
| (3) Object: tail<br>GT Attributes: patterned, spotted, hanging                                    |   | <b>Generative</b><br>-22.257 striped<br><b>-22.457 spotted</b><br>-22.583 upside down<br>-22.66 brown<br>-22.994 running<br>-23.208 jumping<br>-23.252 flying<br>-23.628 walking<br>-23.692 falling<br>-23.692 broken<br>-23.752 white<br>-23.852 open<br>-24.181 black<br>-24.192 dead<br>-24.303 painted         | <b>Contrastive</b><br>0.276 striped<br>0.257 blue striped<br>0.257 barred<br>0.257 red striped<br><b>0.25 spotted</b><br>0.242 partially eaten<br>0.241 male<br>0.24 resting<br>0.24 lined up<br>0.24 camouflage<br>0.239 hiding<br>0.239 pinstriped<br>0.238 slender<br>0.238 piled<br>0.238 horned                                  | <b>SCoNE[14]</b><br>0.992 hairy<br><b>0.969 hanging</b><br>0.951 long<br>0.915 small<br>0.907 black<br>0.898 extended<br>0.897 dark colored<br>0.896 bushy<br>0.896 dark<br>0.878 fluffy<br>0.803 brown<br><b>0.775 patterned</b><br>0.768 gray<br>0.621 curved<br>0.595 fuzzy          |
| (4) Object: shoes<br>GT Attributes: athletic                                                      |  | <b>Generative</b><br>-24.524 black<br>-24.528 broken<br>-24.53 worn<br>-24.707 leather<br>-24.89 in the air<br>-24.936 dead<br>-24.998 cut<br>-25.037 white<br>-25.515 old<br>-25.597 used<br>-25.7 flying<br>-25.738 falling<br>-25.881 painted<br>-25.894 flat<br>-26.036 vintage                                | <b>Contrastive</b><br>0.204 skateboarding<br>0.201 circular<br>0.2 cylindrical<br>0.198 bell shaped<br>0.198 bending<br>0.197 knocked over<br>0.197 bent<br>0.196 pulled back<br>0.195 pinned<br>0.195 holed<br>0.194 operating<br>0.193 cooked<br>0.193 skating<br>0.192 cutting<br>0.192 stopped                                    | <b>SCoNE[14]</b><br>0.998 black<br>0.987 raised<br>0.949 used<br>0.926 dark<br>0.844 worn<br><b>0.749 athletic</b><br>0.709 leather<br>0.669 trimmed<br>0.666 dark colored<br>0.579 gray<br>0.567 close<br>0.472 shiny<br>0.456 brown<br>0.421 old<br>0.415 wet                         |
| (5) Object: hydrant<br>GT Attributes: tall, clean, close, thin, red, painted, metal, yellow, hard |  | <b>Generative</b><br><b>-15.886 red</b><br>-17.218 closed<br>-17.521 broken<br><b>-17.627 painted</b><br>-17.72 for sale<br>-17.77 empty<br>-17.992 open<br>-18.023 old<br>-18.031 orange<br>-18.285 water<br>-18.309 dead<br>-18.377 mounted<br>-18.509 upside down<br>-18.703 funny<br>-18.723 in the background | <b>Contrastive</b><br>0.302 displayed<br>0.3 light skinned<br>0.299 tagged<br>0.297 vertical<br>0.297 pinstriped<br>0.296 lined<br>0.296 lined up<br>0.295 modern<br>0.295 docked<br>0.295 neat<br>0.295 amber<br><b>0.295 painted</b><br>0.295 old fashioned<br>0.295 full<br><b>0.295 tall</b>                                      | <b>SCoNE[14]</b><br>0.909 water<br>0.858 buried<br><b>0.857 metal</b><br>0.838 colorful<br><b>0.83 tall</b><br>0.83 old<br><b>0.814 red</b><br><b>0.806 painted</b><br><b>0.766 thin</b><br>0.686 standing<br>0.627 large<br>0.617 shiny<br>0.602 bright<br>0.492 tagged<br>0.465 dirty |

**Fig. 1:** More qualitative examples on the VAW dataset, **zero-shot vs. fine-tuned**. The generative and contrastive columns use zero-shot retrieval, while the baseline column SCoNE [14] is fine-tuned on the VAW dataset.
